# Supplementary material for: β1-Integrin-Mediated Uptake of Chondrocyte Extracellular Vesicles Regulates Chondrocyte Homeostasis
Source: MDPI journal article supplement (doi:10.3390/ijms25094756), 2024-04-26
Supplement: s1 [file s1]

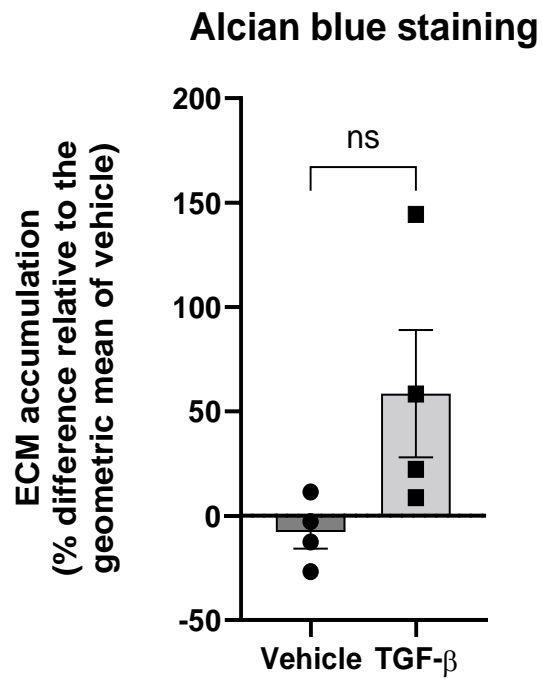

**Figure S1. Alcian blue staining of 3D cultures treated with vehicle or TGF- $\beta$ .** Percentage of extracellular matrix accumulation represented by alcian blue staining normalised to DNA content. Staining was normalised to the geometric mean of vehicle treated cultures. Data represent the mean  $\pm$  SEM (n=4; Unpaired T-test (ns= p>0.05)).

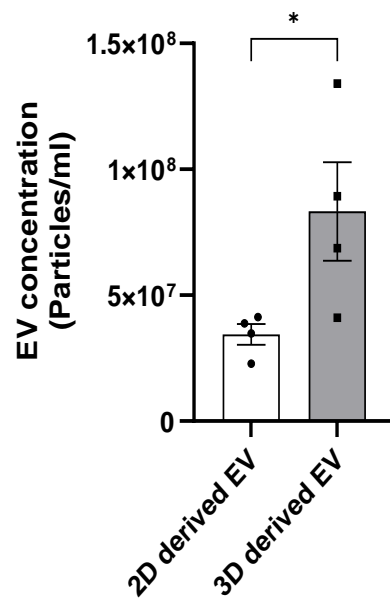

**Figure S2. Response of chondrocytes to different chondrocyte EV preparations.** Concentration of newly generated EVs isolated from chondrocyte monolayers 24h after treatment with EVs isolated from 2D or 3D chondrocyte cultures. Data represent the mean  $\pm$  SEM (n=4; Unpaired T-Test (\*=  $p < 0.05$ )).

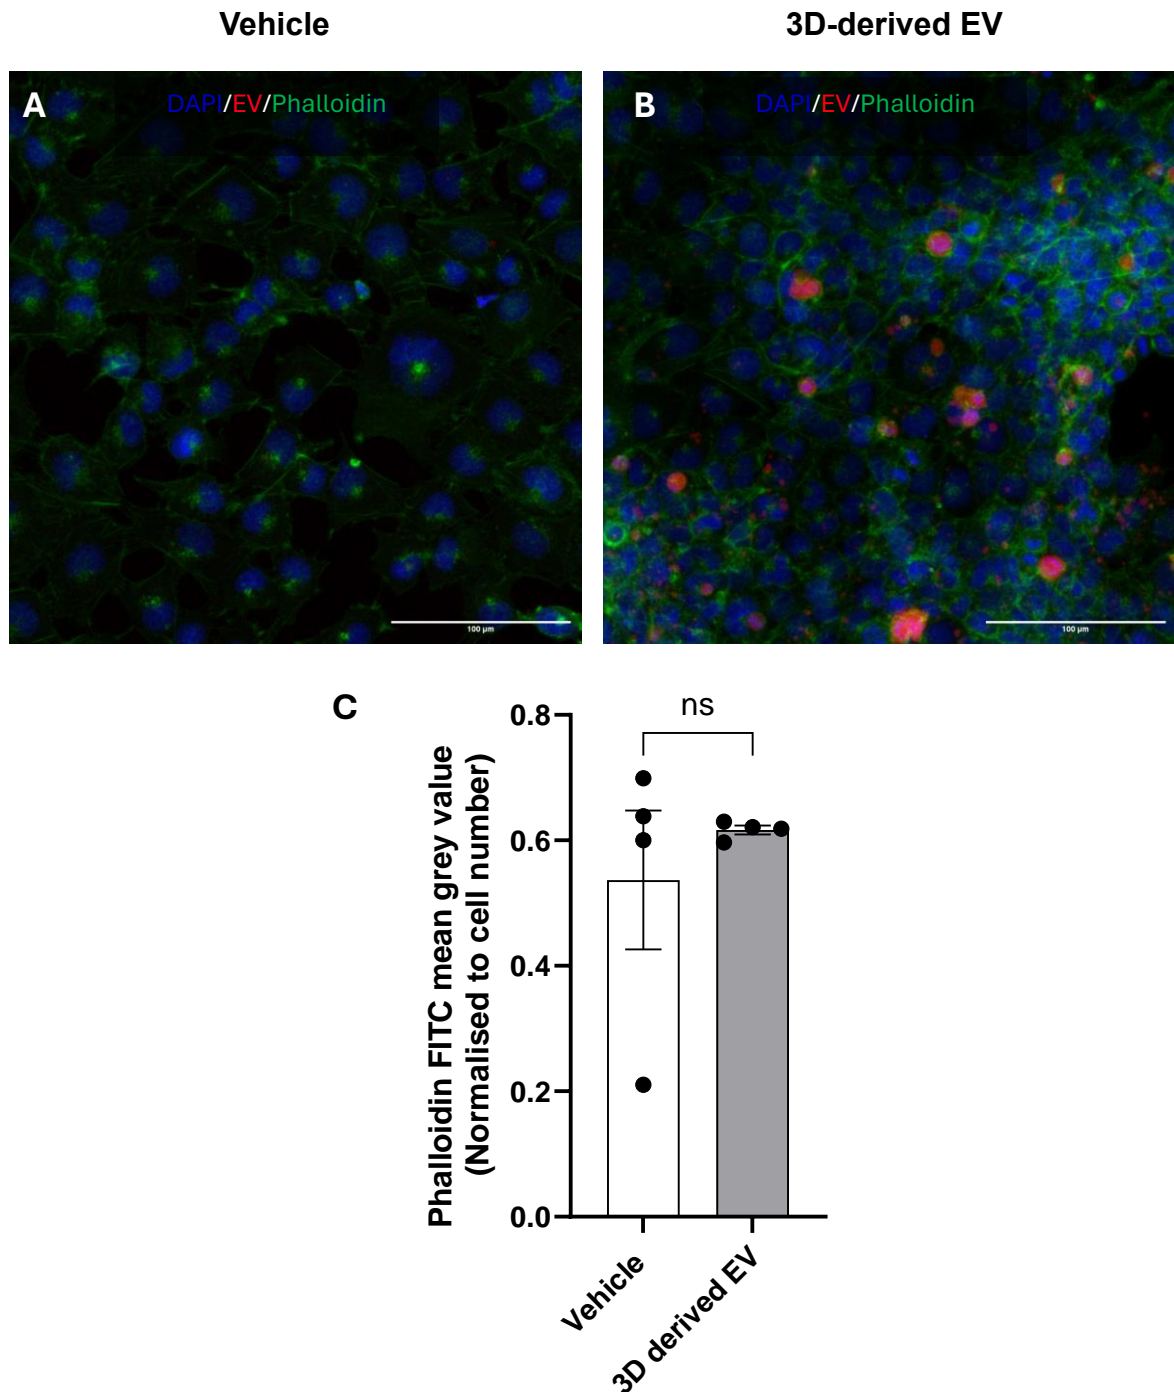

**Figure S3. Phalloidin staining of chondrocytes following treatment with vehicle or 3D-derived EVs.** Representative confocal images of chondrocytes treated with **A.** Vehicle or **B.** 3D-derived EVs (red), chondrocytes are stained with DAPI for the nucleus (blue) and cytoskeletal staining with phalloidin (green). **C.** Mean grey value of phalloidin staining normalised to cell number from cells treated with vehicle or 3D-derived EVs. Data represent the mean  $\pm$  SEM (n=4; Unpaired T-test (ns=  $p>0.05$ )).
